# Supplementary figures and images for: Tetranuclear rhodium clusters with facial cyclooctatetraene ligandsDedicated to Professor Hansgeorg Schnöckel on the occasion of his 60th birthday. Electronic supplementary information (ESI) available: packing diagrams for 4 and 6. See http://www.rsc.org/suppdata/dt/b1/b105485f/
Source: Royal Society of Chemistry journal article supplement (doi:10.1039/b105485f), 2001-11-22

SCHAKAL

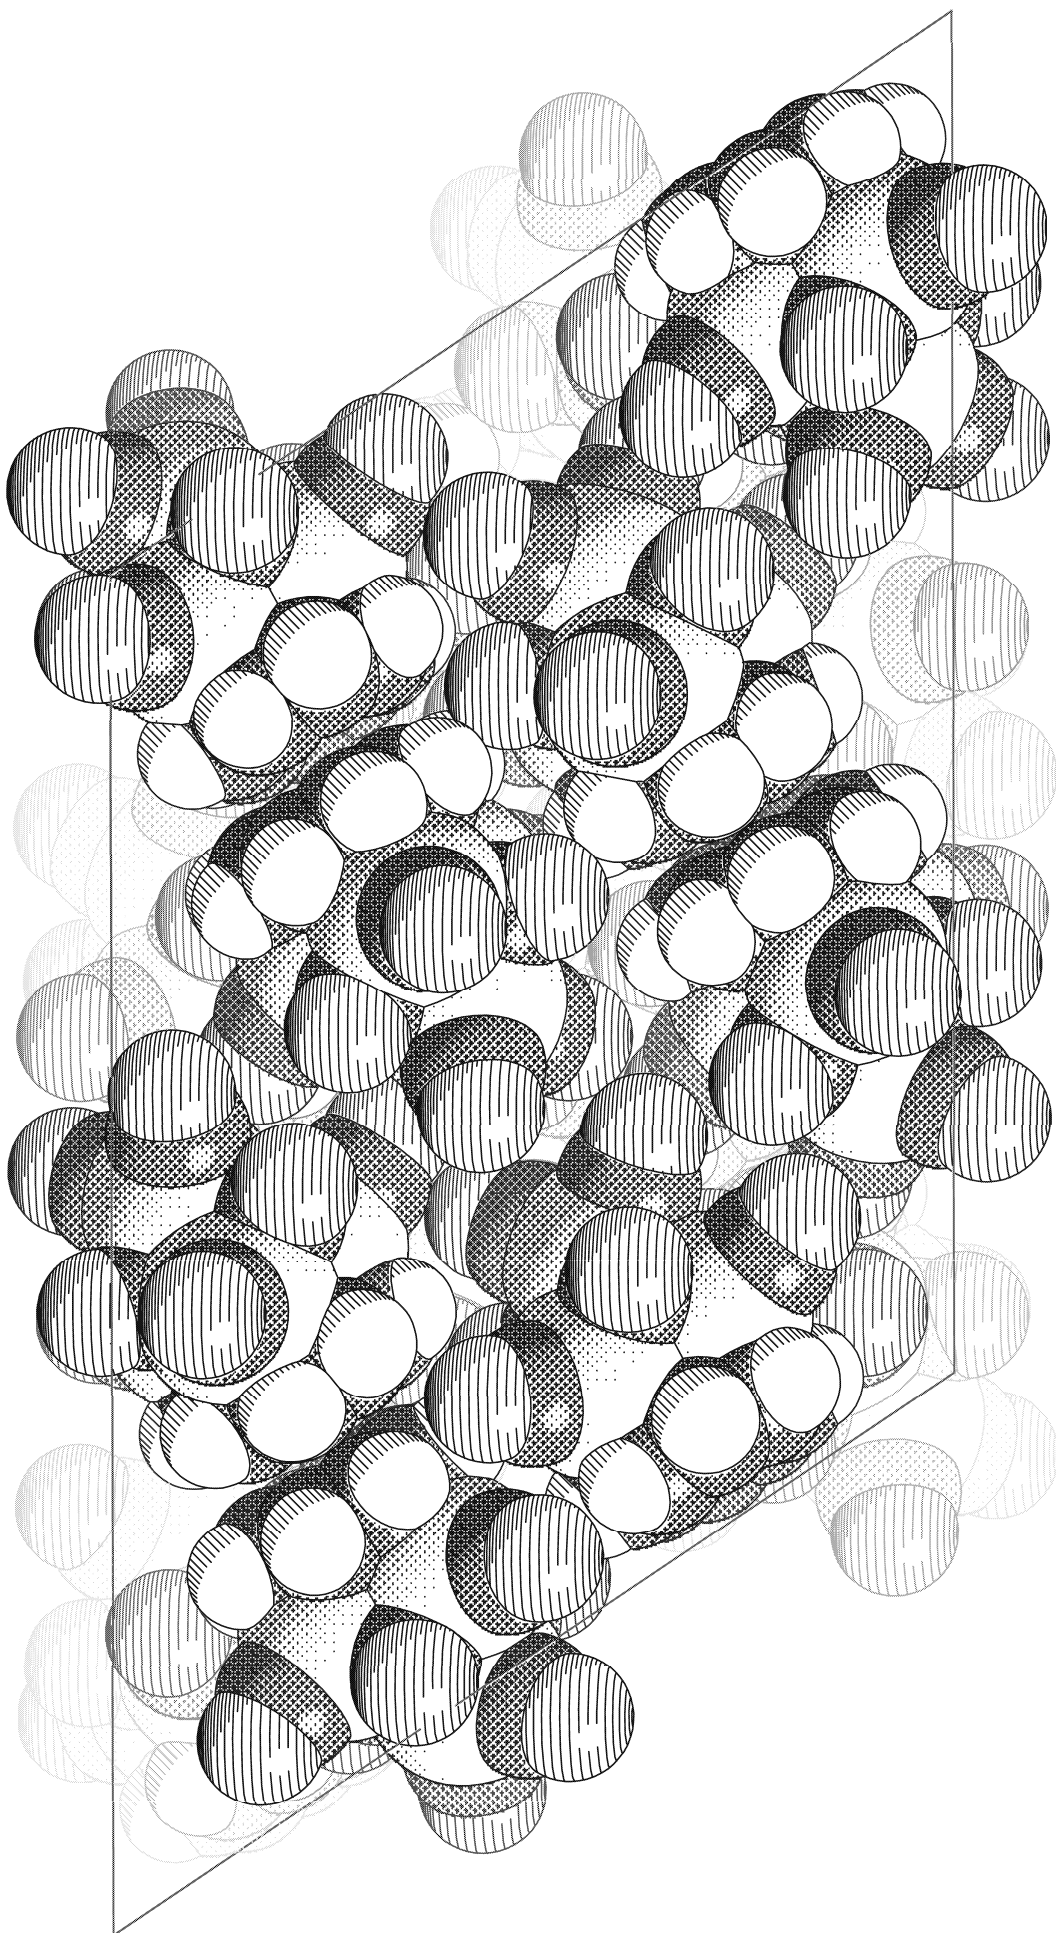

Supplement: figure_a.pdf [file figure_a.pdf]

SCHAKAL

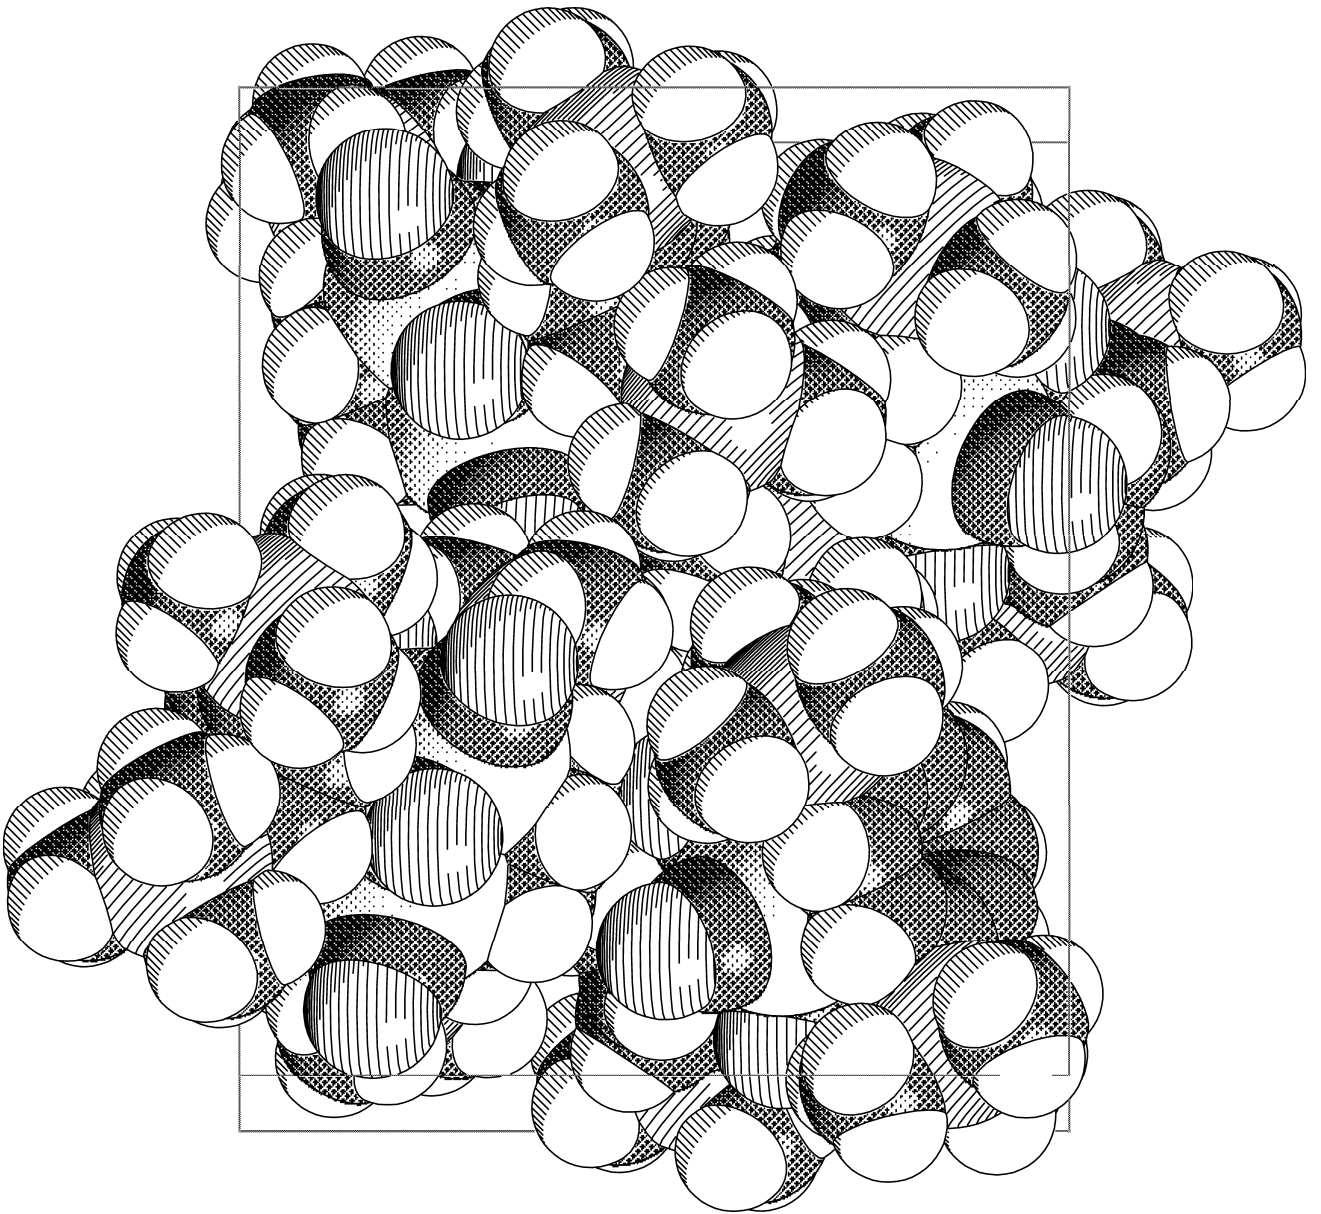

Supplement: figure_b.pdf [file figure_b.pdf]
